# Supplementary material for: Switch From Fetal to Adult SCN5A Isoform in Human Induced Pluripotent Stem Cell–Derived Cardiomyocytes Unmasks the Cellular Phenotype of a Conduction Disease–Causing Mutation
Source: PubMed Central journal article supplement — J Am Heart Assoc. 2017 Jul 24;6(7):e005135. doi: 10.1161/JAHA.116.005135 (PMC5586268; doi:10.1161/jaha.116.005135), 2017-07-24

# **Supplemental Material**

**Table S1.** List of the applied primers used for PCR per gene.

| <b>Gene</b>                 | <b>Forward primer 5' to 3'</b> | <b>Reverse primer 5' to 3'</b> |
|-----------------------------|--------------------------------|--------------------------------|
| <i>DPPA4</i>                | TGGTGTCAAGGTGGTGTGTGG          | CCAGGCTTGACCAGCATGAA           |
| <i>KLF4</i> endogenous      | ACAGTCTGTTATGCACTGTGGTTTCA     | CATTGTTCTGCTTAAGGCATACTGG      |
| <i>KLF4</i> transgene       | CCTCGCCTTACACATGAAGAGACA       | CACCAGACCAACTGGTAATGGTAGC      |
| <i>MYC</i> endogenous       | ACAGAAATGTCCTGAGCAATCACCT      | GCCAAGGTGTGAGGTTGCAT           |
| <i>MYC</i> transgene        | GCTACGGAACTCTTGTGCGTGA         | CACCAGACCAACTGGTAATGGTAGC      |
| <i>NANOG</i>                | AGGTCTCGTATTTGCTGCATCGT        | GAAACACTCGGTGAAATCAGGTAA       |
| <i>OCT4</i> endogenous      | GGAAGGAATGGGAACACAAAGG         | AACTCACCTTCCTCCAACCA           |
| <i>OCT4</i> transgene       | GGCTCCTCCATGCATTCAAAC          | CATGGCCTGCCCGGTTATTA           |
| <i>RPL37A</i>               | GTGGTTCCTGCATGAAGACAGTG        | TTCTGATGGCGGACTTTACCG          |
| <i>SCN5A</i> adult specific | TCATGGCATACAAACCTGAATT         | GCTTCTTACAGACTGGAT             |
| <i>SCN5A</i> fetal specific | TCATGGCGTATGTATCAGAAAA         | GCTTCTTACAGACTGGAT             |
| <i>SOX2</i> endogenous      | TGGCGAACCATCTCTGTGGT           | CCAACGGTGTCAACCTGCAT           |
| <i>SOX2</i> transgene       | GCACACTGCCCTCTCACAC            | CACCAGACCAACTGGTAATGGTAGC      |
| <i>ZNF206</i>               | TCACCATGGCCAGAGGAGAG           | GCAGGCCACGCCTTATTCTC           |

**Table S2.** Average cell capacitance and series resistance in all experimental groups. Values are depicted as mean±SEM.

|                               | Early-stage hiPSC-CMs |          |                      |                       | Late-stage hiPSC-CMs |          |                      |                       |
|-------------------------------|-----------------------|----------|----------------------|-----------------------|----------------------|----------|----------------------|-----------------------|
|                               | Ctrl1                 | Ctrl2    | I230T <sup>het</sup> | I230T <sup>homo</sup> | Ctrl1                | Ctrl2    | I230T <sup>het</sup> | I230T <sup>homo</sup> |
| <b>Cell capacitance (pF)</b>  | 22.7±2.0              | 19.8±2.2 | 21.2±2.0             | 23.4±1.6              | 27.5±2.0             | 20.2±3.0 | 31.4±2.4             | 48.8±5.8              |
| <b>Series resistance (MΩ)</b> | 6.1±0.3               | 6.6±0.5  | 7.0±0.4              | 6.6±0.4               | 6.3±0.3              | 7.4±0.5  | 6.3±0.5              | 5.7±0.4               |

**Figure S1.** Scheme of experimental approach depicting the different time points during differentiation at which the different steps, i.e. addition of lactate, enzymatic dissociation, collection of RNA and electrophysiological measurements, were performed.

**Experimental scheme for electrophysiological measurements**

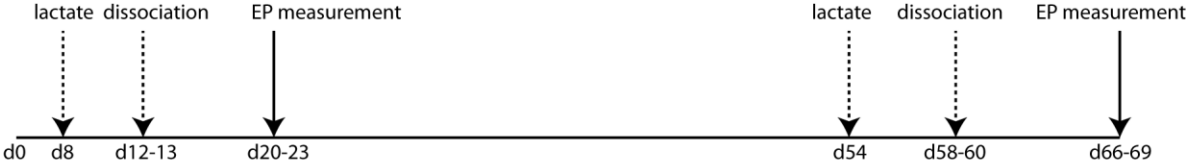

**Experimental scheme for RNA analysis**

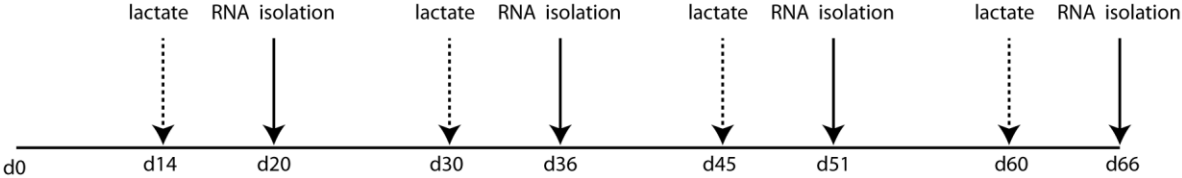

**Figure S2. Comparison of  $I_{Na}$  properties in control 1 (Ctrl1) hiPSC-CMs measured after a short and extended culture period (early- and late-stage, respectively).** Current-voltage relationships (A), voltage dependence of activation (B), voltage dependence of inactivation (C), recovery from inactivation (D) and time dependence of inactivation (E) are shown. Inset in D depicts the voltage clamp protocol to determine P2/P1 values. In E, left and right panel indicate  $\tau_{slow}$  and  $\tau_{fast}$ , respectively. Upon extended time in culture,  $I_{Na}$  density, recovery rate and inactivation rate increase. \*indicates  $p < 0.05$  (Mann-Whitley U test).

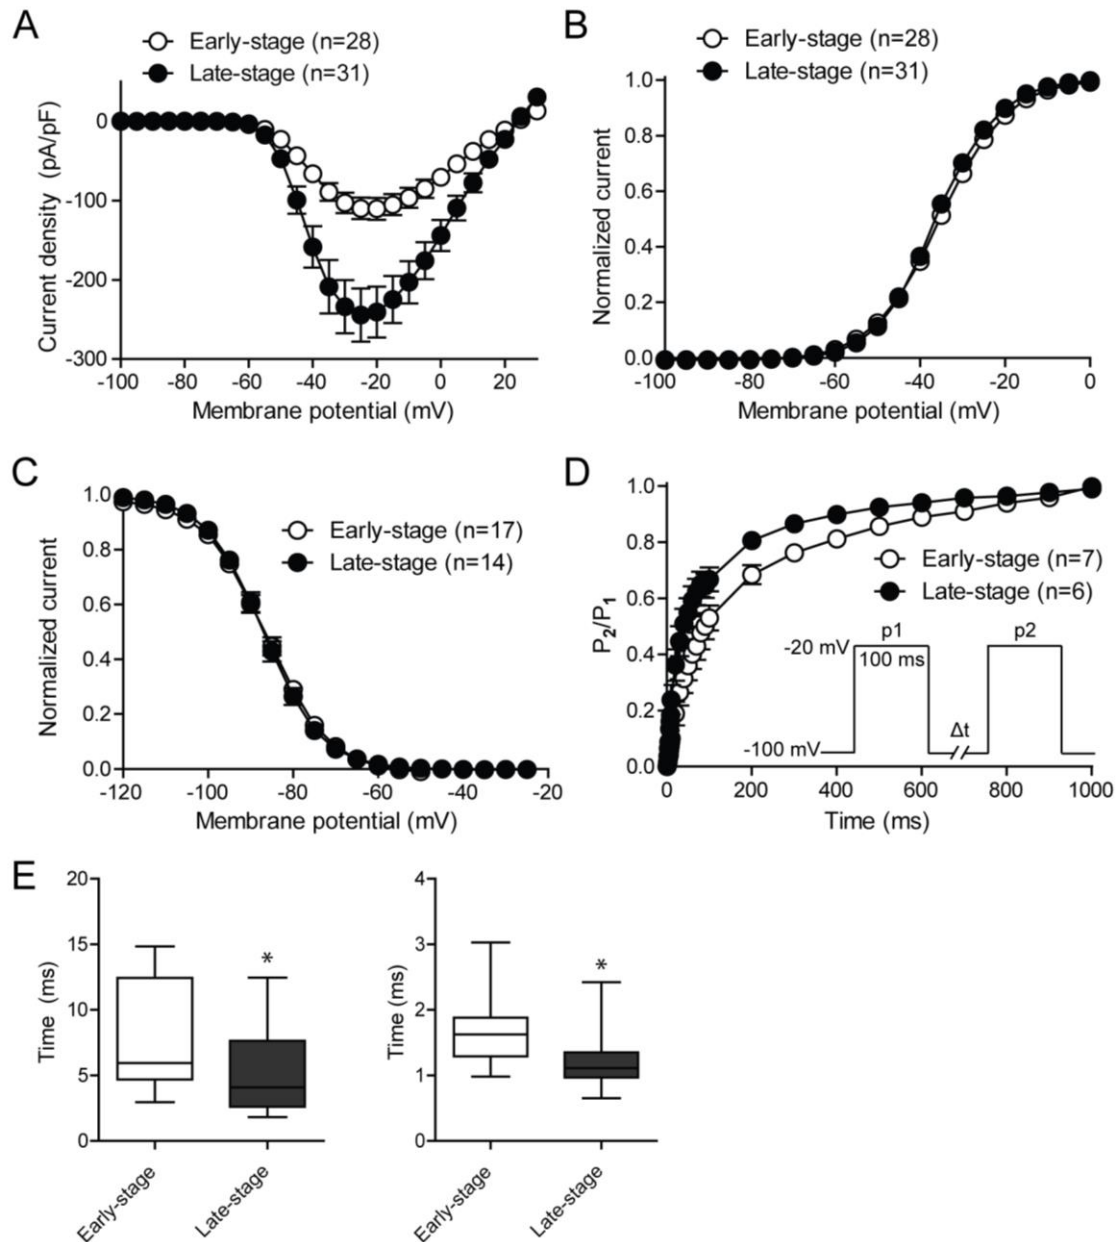

**Figure S3. Comparison of  $I_{Na}$  properties in control 2 (Ctrl2) hiPSC-CMs measured after a short and extended culture period (early- and late-stage, respectively).** Current-voltage relationships (A), voltage dependence of activation (B), voltage dependence of inactivation (C), recovery from inactivation (D) and time dependence of inactivation (E) are shown. Inset in D depicts the voltage clamp protocol to determine P2/P1 values. In E, left and right panel indicate  $\tau_{slow}$  and  $\tau_{fast}$ , respectively. Upon extended time in culture,  $I_{Na}$  density and the slow component of inactivation rate increase, while voltage dependence of inactivation displays a positive shift of 3 mV. \*indicates  $p < 0.05$  (Mann-Whitley U test).

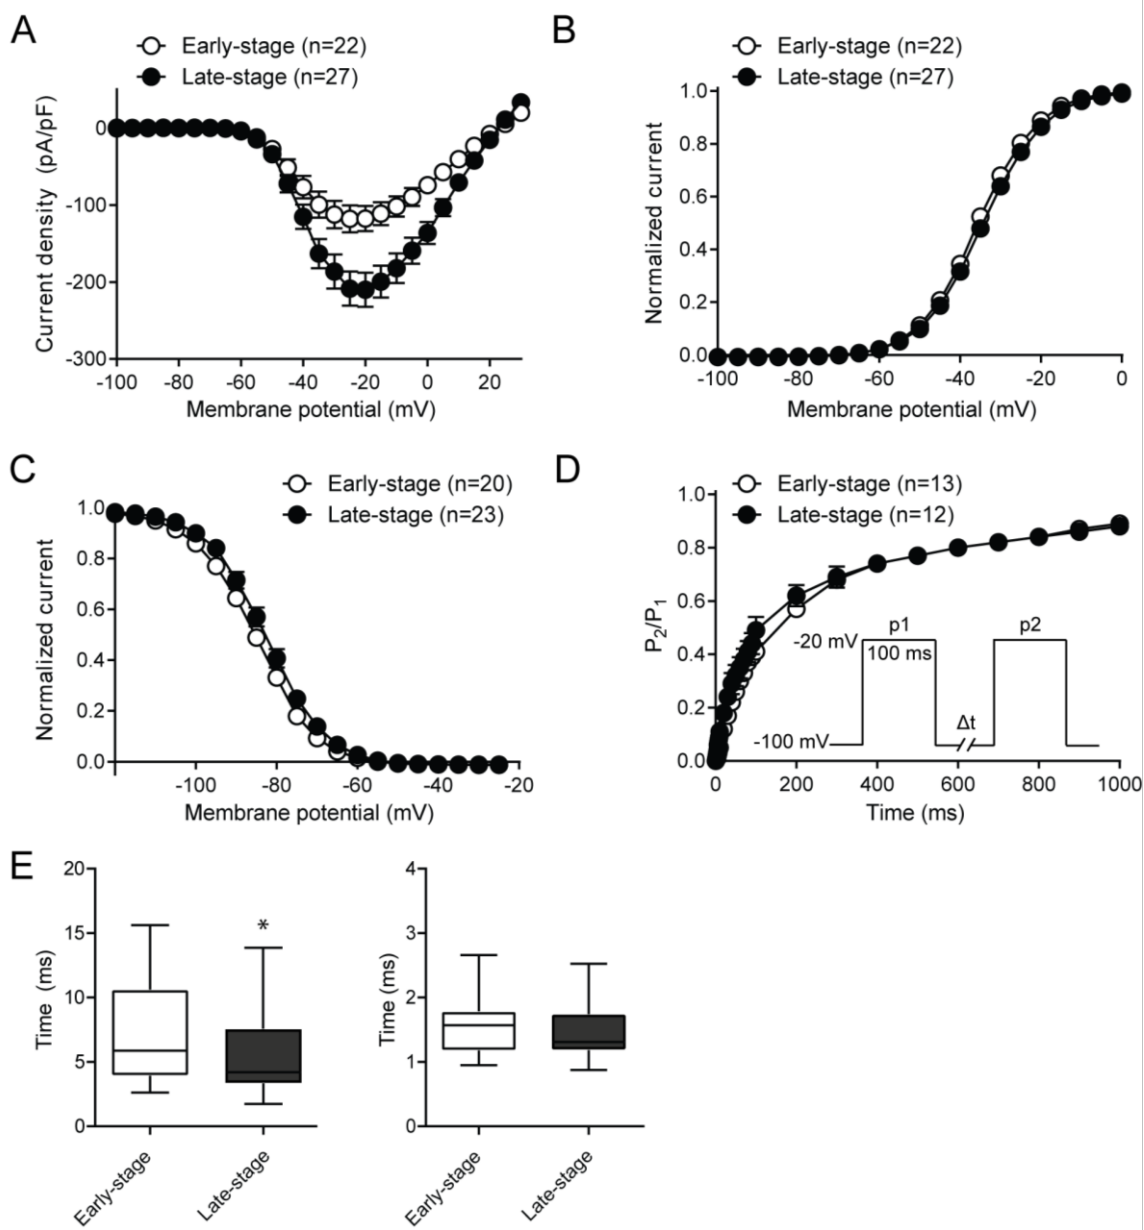

Supplement: JAH3-6-e005135-s001.pdf [file JAH3-6-e005135-s001.pdf]
